# Supplementary material for: Time Series Analysis of Ground-Based Microwave Measurements at K- and V-Bandsto Detect Temporal Changes in Water Vapor and Temperature Profiles
Source: Copernicus journal article supplement (doi:10.5194/gi-2016-16), 2016-07-01
Supplement: Supplementary file [file gi-2016-16-AC2-supplement.pdf]

# Time Series Analysis of Ground-Based Microwave Measurements at K- and V-Bands to Detect Temporal Changes in Water Vapor and Temperature Profiles

Sibananda Panda<sup>1</sup>, Swaroop Sahoo<sup>2</sup>, G. Pandithurai<sup>3</sup>

<sup>1</sup>School of Electronics Engineering, KIIT University, Odisha, India

<sup>2</sup>Department of Electrical Engineering, Indian Institute of Technology Palakkad, Palakkad, Kerala, India

<sup>3</sup>Indian Institute of Tropical Meteorology, Pune, India

Correspondence to: Swaroop Sahoo (swaroop.sahoo769@gmail.com)

5  
10 **Abstract.** Ground-based microwave measurements performed at water vapor and oxygen absorption line frequencies are widely used for remote sensing of tropospheric water vapor density and temperature profiles, respectively. This paper focuses on using time series of independent frequency measurements at K- and V-bands along with statistically significant but short background data sets to retrieve and sense temporal variations and gradients in water vapor and temperature profiles. To study this capability, Indian Institute of Tropical Meteorology (IITM) had deployed a microwave radiometer at  
15 Mahabubnagar, Hyderabad during August 2011 as part of the Integrated Ground Campaign during the Cloud Aerosol Interaction and Precipitation Enhancement Experiment (CAIPEEX-IGOC). In this study, time series of water vapor and temperature profiles were retrieved using Bayesian optimal estimation method which uses Levenberg-Marquardt optimization technique. The temperature profiles for the first time have been estimated using optimized background information covariance matrix so as to improve the accuracy of the retrieved profiles as well as be able to detect gradients.  
20 Estimated water vapor and temperature profiles are compared with those taken from the reanalysis data updated by the Earth System Research Laboratory National Oceanic and Atmospheric Administration (NOAA), to determine the range of possible errors. Similarly, RMS errors are evaluated for the water vapor and temperature profiles for a month to estimate the accuracy of the retrievals. It is found that water vapor and temperature profiles can be estimated with an acceptable accuracy by using a background information data set compiled over a period of one month.

25 **Keywords-***microwave radiometer, humidity, temperature and Bayesian optimal estimation*

## 1. INTRODUCTION

30 Water vapor along with temperature affects various atmospheric processes, particularly cloud formation, initiation of convective storms (Trenberth et. al., 2005) and tropical cyclones (Needs, 2009)(Ali, 2009). Therefore, accurate information about their spatial and temporal distribution as well as variation in the lower troposphere is essential for initialization of numerical weather prediction (NWP) models which in turn improves the forecast of various weather events (NRC, 2009).

Various instruments are used to measure water vapor and temperature profiles in the lower troposphere i.e., radiosondes, Raman Lidar and microwave radiometer. Radiosondes are by far the main source of water vapor and temperature profiles

information for numerical weather prediction. The measured profiles have a vertical resolution of approximately 10 m in the lowest 3 km of troposphere but are launched once or twice a day at most of the site in the world (Wang et. al., 2008). Therefore, they cannot be used to detect the temporal variations and gradients in the atmospheric humidity and temperature profiles at regular intervals of time and space. Raman lidars (Goldsmith et. al., 1998) and differential absorption lidars (DIAL) (Spuler et. al., 2015) are also used during clear sky conditions for sensing humidity profiles with a vertical resolution comparable to that of a radiosonde from ground to an altitude of 3 km but are quite expensive. Therefore, they cannot be deploy in a dense network to provide information on spatial distribution and variation on water vapor and temperature. In addition to these instruments, microwave radiometers, both ground-based and airborne, operating in the 20-60 and 166-190 GHz ranges are used for the retrieval of water vapor, temperature and liquid water profiles. Ground-based microwave radiometers have been designed, fabricated and used to sense water vapor and temperature profiles from ground to 10 km altitude (Iturbide-Sanchez et.al., 2007)(Solheim, et al., 1998). Satellite based instruments like Advanced Microwave Sounding Units (AMSU-A and -B) onboard NOAA-15 (Susskind et.al., 2011) (Rosenkranz, 2001) as well as Sondeur Atmospherique du Profil d'Humidite Intertropicale par Radiometrie (SAPHIR) Microwave Analysis and Detection of Rain and Atmospheric Systems (MADRAS) onboard the Megha-Tropiques (Rao, et. al., 2013) have been used to retrieve humidity and temperature profiles in addition to a range of other parameters. The AMSU-A and -B channels operate close to the 22.235, 60, 183 GHz absorption lines as well as the 89 GHz window frequency. In addition to these instruments a mini-satellite FLOWer constellation of millimeter-wave RADiometers for atmospheric observations known as FLORAD operates at frequencies close to the 89, 118 and 183 GHz to estimate water vapor, temperature, cloud liquid content and precipitation rate(Marzano, et al., 2009). Both the ground-based and airborne microwave radiometers have a fine temporal resolution ranging from a few millisecond to a few minutes depending on the integration time of the measurement channel. However, radiometers have a variable vertical resolution and accuracy depending on the thermodynamic property being retrieved. Humidity and temperature profiles have been retrieved from microwave radiometer measurements by Westwater (Westwater, 1993) using various retrieval techniques while Scheve (Scheve et al., 1999) used the minimum variance estimation technique. Sahoo (Sahoo et al., 2015b) used the Bayesian optimal estimation technique while focusing on sensing the gradients and temporal changes associated with water vapor profiles retrieved by using K-band radiometer measurements and an optimized background datasets.

The novel feature of the work discussed in this paper is the estimation of water vapor density and temperature profiles within certain limits of accuracy while detecting temporal variations and gradients in the profiles. The profiles are estimated by inverting K- and V-band measurements using the Bayesian algorithm along with a background data set compiled over a period of one month. The background dataset is specific to the time period of radiometer measurements and conforms to the weather conditions during that period. This method results in a significant improvement of accuracy over the normal method of using a large dataset collected for a long period of time as background dataset. However, the improved results are specific for a location and the method needs be adapted for a particular region.

The Bayesian optimally estimated profiles are then compared with profiles estimated using the neural network (NN) method as well as profiles taken from the reanalysis data from Earth System Research Laboratory, National Oceanic and Atmospheric Administration (NOAA). Here, the reanalysis data is considered as truth and the error in this study is the difference between the radiometer retrieved profiles (using both neural network and Bayesian optimal estimation) and those from the reanalysis data.

## 2. INSTRUMENTS DEPLOYMENT

Indian Institute of Tropical Meteorology (IITM) had deployed a microwave radiometer in Mahabubnagar ( $16^{\circ} 44' N$ ,  $77^{\circ} 59' E$ ), Hyderabad for the whole month of August, 2011 as part of the Integrated Ground Campaign during the Cloud Aerosol Interaction and Precipitation Enhancement Experiment (CAIPEEX-IGOC) (Leena et. al., 2015). This is a frequency agile radiometer and operated at 8 frequencies in the range 22-30 GHz and 14 frequencies from 51.0 GHz to 58.0 GHz in V-band, at elevation angles of  $15^{\circ}$ ,  $90^{\circ}$  and  $165^{\circ}$ . The resolution of the instrument varies from 0.1 to 1 K depending on integration time i.e., 0.01 to 2.5 seconds (Radiometrics Corporation, 2008) . The accuracy of the brightness temperature measurements is approximately 0.2 K and the bandwidth of the channels is 300 MHz. This instrument also has a single channel infrared radiometer in addition to surface pressure, humidity and temperature sensors. The multichannel microwave radiometer is calibrated by injecting noise from a noise diode to remove the system gain fluctuations. Two sided tipping curve calibration method has been used to determine the brightness temperatures from the measured voltages for water vapor channels and the cold (liquid nitrogen) and hot load calibration (internal black body at ambient temperature) is used to calibrate the temperature channels measurements.

Radiometer measurements during the field campaign were performed throughout the day and night under varying atmospheric conditions which included clear and cloudy skies. The time series of calibrated brightness temperatures for 22.23, 25.0, 51.243 and 53.36 GHz are shown in Figure 1. It can be observed that brightness temperatures at 22.23 GHz are comparatively higher than those at 25 GHz. This is because 22.23 GHz is the water vapor resonance frequency and is more sensitive to water vapor in the atmosphere than 25 GHz which is significantly far away from the water vapor resonance frequency. Similarly, measurements at 53.36 GHz are higher than those at 51.243 GHz because of the proximity of 53.36 GHz to the oxygen complex. Thus, measurement frequencies are sensitive to water vapor and temperature to a varying extent. This can also be confirmed by analyzing the weighting functions corresponding to water vapor and temperature frequencies shown in Figure 2. Figure 2(a) shows that weighting function values for 22.234 GHz are higher than those at 25.00 GHz at altitudes above 2 km while weighting function values at 25 GHz have higher values than those at 22.234 GHz below 2 km. This is because the measurements at 22.234 GHz are comparatively more sensitive to changes in water vapor at altitudes above 2.5 km while those at 25.00 GHz are more sensitive to changes in water vapor below that altitude. However, the weighting function values at 22.234 GHz for altitude range 2.5-8 km are significantly higher than those at 25.00 GHz so that brightness temperatures at 22.234 GHz are still higher than those at 25.00 GHz.

The temperature measurement frequencies shown in Figure 2 (b) are most sensitive to temperature variations from 0 to 4 km altitude. 53.36 GHz weighting function (represented in green in Figure 2 b) is higher than 51.243 GHz weighting function (represented in blue in Figure 2 b) at all altitudes.

To complement the radiometer measurements, Vaisala RS92-SGP radiosondes were launched everyday at 12 UTC. These 5 radiosondes were launched from the radiometer deployment location to provide vertical profiles (temporal resolution of two seconds) of relative humidity, temperature, dew point temperature, pressure, and wind. These radiosondes data have been used as the source of apriori information as well as the source of background dataset during this study and analysis.

### 3. THEORETICAL BACKGROUND

#### 3.1 Remote Sensing of Water Vapor and Temperature Profile

10 Remote sensing of water vapor and temperature is based on the measurement of microwave radiation emitted by water vapor and oxygen molecules. The emission and absorption of microwave radiation due to water vapor and oxygen in each tropospheric layer change the microwave radiation that reaches the ground. This variation in radiation is due to the concentration of water vapor in the atmosphere and the temperature at various altitudes. Therefore, these microwave radiation reaching the ground are source of information about the humidity distribution and temperature variation in the 15 atmosphere at different heights.

Measurement of this radiation at the weak water humidity absorption line (centred at 22.235 GHz) is used for the sensing of water vapor profile variation. This is based on humidity absorption line broadening. This broadening is due to motion of the water molecules and their collisions with other water molecules and is known as pressure broadening. Thus change in pressure has a significant impact on the width of the absorption lines as well as the absorption values. So, a decrease in the 20 atmospheric pressure reduces the line width and increases the water vapor absorption line strength which is most prominent at 22.235 GHz (the center of the absorption line). Therefore, closer the proximity of the measurement frequency to the weak water vapor resonance frequency higher the sensitivity to water vapor at high altitudes. As the pressure increases the absorption line widens resulting in reduced sensitivity to water vapor at high altitudes. However, frequencies farther away from the center frequency are more sensitive to water vapor changes close to ground level. This is again proven by the 25 weighting functions at various frequencies. Weighting functions closest to the water vapor resonance frequencies are almost twice more sensitive to water vapor at 8 km than near ground level. While frequencies further way from the resonance peak are most sensitive to changes close to ground level. Therefore, a combination of various frequency measurements is able to detect the profile information about water vapor.

Similarly, microwave radiation from oxygen at the 60 GHz absorption complex can be used for retrieving temperature 30 profile information because atmospheric absorption in the 50-75 GHz range is primarily due to oxygen molecules. The absorption due to oxygen molecule is due to magnetic moment 33 spin-rotational lines between 51.5-67.9 GHz. These spin-rotational lines blend together at lower altitude due to the pressure broadening of the lines. This blended absorption lines has a shape similar to an absorption band centered at 60 GHz. However, the absorption line intensity is not the simple addition of

isolated line intensities but the "overlap interference" which gives rise to a very complex absorption band called the oxygen complex. As a result the opacity at the 60 GHz is significantly higher than that at 50 GHz, so the radiometer just observes the radiation emitted close to the ground surface. To sample the whole troposphere measurements need to be performed at a number of frequencies away from the center frequency.

- 5 Since, oxygen is the most well mixed gas in the atmosphere and its proportion in the atmosphere is almost constant and altitude independent from ground level to 80 km, the microwave radiation at the oxygen absorption lines contains atmospheric temperature profile information.

### 3.2 Retrieval Techniques

#### 10 3.2.1 Bayesian Optimal Estimation

The Bayesian optimal estimation is an inversion method using multiple K- and V-band microwave frequency measurements to retrieve profiles of humidity and temperature. This is because various measurement frequencies have varying sensitivity to water vapor and temperature at various altitudes. These multiple measurements combined with the a-priori information and a background information covariance matrix can be used for retrieving water vapor and temperature profiles while sensing the associated temporal variations and gradients.

- 15 The retrieval of water vapor and temperature profiles from brightness temperature measurements is a non-linear problem; a variation of the iterative Gauss-Newton method is required for the estimation process. This retrieval technique uses a-priori humidity and temperature information as a constraint to determine an unique solution to the inverse problem. A-priori in this paper represents the measurement of water vapor and temperature profiles prior to the radiometer brightness temperature measurements. This is also known as the initialization profile in this paper. The a-priori information is taken from radiosonde launched a few hours before the radiometer performs the measurement.

- In addition to the a-priori information, water vapor density and temperature background information statistics is also introduced as the inversion constraint. These statistics provide variability information associated with the atmospheric humidity and temperature profiles as well as the inter layer correlation during a particular time period. The number of elements in the background data set and the relationships among them determines the values of the background information covariance matrix elements. Since, in this study the dataset used for calculating the background statistics has been taken close to measurement time it will be more representative of weather conditions during that time period and location. Background information statistics here means the background information covariance information represented by the matrix  $\bar{S}_a$ .

- 25 30 The Bayesian optimal estimation uses the Levenberg-Marquardt (LM) optimization method (Rodgers, 2000). The LM technique is shown in Eqs. (1).

$$\bar{x}_{i+1} = \bar{x}_i + \left( (1 + \gamma)\bar{S}_a^{-1} + \bar{K}_i^T \bar{S}_e^{-1} \bar{K}_i \right)^{-1} \left( \bar{K}_i^T \bar{S}_e^{-1} [\bar{T}_E' - \bar{T}_E(\bar{x}_i)] - \bar{S}_a^{-1} [\bar{x}_i - \bar{x}_a] \right) \quad (1)$$

where  $i$  is the iteration index,  $\bar{K}_i$  is the kernel or weighting function matrix and determines the sensitivity of the measurements at various frequencies to changes in the parameter of interest at various altitudes,  $\bar{x}_i$  is the water vapor density or temperature profile which is updated at each iteration and is same as initialization profile for  $i = 1$ ,  $\bar{T}_E^r$  is the measured brightness temperature vector at water vapor density or temperature measurement frequencies,  $\bar{x}_E$  is the background profile and is same as the initialization profile in this case because a small dataset is used as background dataset.  $\bar{T}_E^r(\bar{x}_i)$  is the radiative transfer model simulated brightness temperature using the absorption coefficients calculated from a Rosenkranz model (Rosenkranz, 1993) (Rosenkranz, 1998).

$\bar{S}_E$  is the observation error covariance matrix and contains the uncertainty information associated with the measurement. The observation error covariance matrix takes into consideration the radiometric measurement noise, representativeness error and radiative transfer model errors. The diagonal elements of the observation error covariance matrix are approximately in the range of 0.23 to 0.29 K<sup>2</sup> and some of the off-diagonal elements are close to zero. The observation error covariance,  $R$ , determines the uncertainty associated with the observations. This uncertainty has contributions from radiometric noise (E), forward model (F) and representativeness (M) errors. Radiometric noise is determined based on radiometric resolution which is the minimum difference in scene brightness temperature that can be sensed by the receiver. This value for MP3000-A varies from 0.1 to 1 K depending on integration time (Radiometrics Corporation, 2008). The typical value is 0.25 K for each measurement frequency while considering an integration time of 250 msec. In addition to the radiometric noise, forward model errors introduced due to inadequate absorption models. These are determined using the difference between brightness temperatures simulated by two absorption models i.e., the Rosekranz model as well as MPM93 (Liebe et al., 1993) which are then used to determine the forward model error covariance matrix. Another source of uncertainty is the representativeness error which takes into consideration the radiometer's sensitivity to fluctuations in the atmosphere on a time scale shorter than that can be represented by any numerical weather prediction model or radiosondes profiles. The representative covariance is calculated in Eq. 2.

$$M = E(\bar{T}_E^r(t + \Delta t) - \bar{T}_E^r(t))(\bar{T}_E^r(t + \Delta t) - \bar{T}_E^r(t))^T \quad (2)$$

where  $t$  is time and  $\Delta t$  is the time scale of difference. The observation error covariance matrix is shown in Figure 3 and given by  $R = E + F + M$ .

$\bar{S}_E$  is the background covariance matrix which is computed using information from 50 radiosonde profiles launched over a period of one month.  $\gamma$  is the LM factor and the value of  $\gamma$  is updated at each iteration based on value of  $J(x)$  from Eq. (3). Various initial values of  $\gamma$  in the range of  $\gamma = 1$  and  $\gamma = \infty$  have been considered for starting of the iteration. For  $\gamma = 1$ , the iteration might move towards a local minima while in case of  $\gamma = \infty$  the iteration immediately moves towards the global minima which gives a solution which does not converge. Therefore, the initial value of  $\gamma$  is assumed to be one. It was observed that the algorithm did not converge with a valid output for this initial value of gamma so the initial value of gamma is increased at regular intervals to check the convergence. It was found empirically, that gamma with an initial value of 5000 converges the algorithm for all cases. As part of the iteration if the value of  $J(x)$  increases, then the iteration is discarded and

the value of  $\gamma$  is increased 10 fold and the iteration is repeated. This is done so as to discard any invalid output which could be close to one of the local minima. If value of  $J(x)$  decreases, then the iteration is valid and the value of  $\gamma$  is reduced by a factor of 2 for the next iteration even if the convergence criteria is not satisfied (Hewison, 2007). This process is followed until the convergence criterion is validated by the output profile. This process is illustrated in Figure 4. It can be observed that as the cost function decreases, the gamma value decreases and vice versa. At local minima of the cost function the gamma value also reduces.

LM technique output is dependent on the cost function represented by  $J(x)$  in Eq. (3)

$$J(x) = [\bar{x} - \bar{x}^b]^T \bar{S}_x^{-1} [\bar{x} - \bar{x}^b] + [\bar{T}_H(\bar{x}_t) - \bar{T}_H^r]^T \bar{S}_t^{-1} [\bar{T}_H(\bar{x}_t) - \bar{T}_H^r] \quad (3)$$

where  $\bar{x}^b$  and  $\bar{x}$  are the initialization profiles (either water vapor or temperature) and output profiles (either water vapor or temperature) for each iteration, respectively. The final water vapor or temperature output profiles are determined by the convergence criterion given by Eq. (4)

$$[\bar{T}_H(\bar{x}_{t+1}) - \bar{T}_H(\bar{x}_t)]^T \bar{S}_t^{-1} [\bar{T}_H(\bar{x}_{t+1}) - \bar{T}_H(\bar{x}_t)] \ll m \quad (4)$$

where  $m$  is 5 and 7 (dimension of water vapor and temperature measurement vector) for water vapor and temperature profile retrieval and  $\bar{S}_t$  is the covariance between  $\bar{T}_H^r$  and  $\bar{T}_H(\bar{x}_t)$ . Eq. (4) determines the termination of the iterative process. The iteration stops when Eq. (4) reaches a value  $q$  which is very small in comparison to  $m$ . Therefore, the value of  $q$  is chosen to be 0.05 and 0.07 for water vapor and temperature profile retrieval, respectively, which is 1/100 times the number of measurements used).

### 3.2.2 Impact of Background Dataset on Retrieval

As already studied and determined by Scheve (Scheve & Swift, 1999), Hewison (Hewison, 2007), Solheim (Solheim, et al., 1998) and Sahoo (Sahoo et. al., 2015a) the number of measurement frequencies which provide altitude related information about water vapor and temperature are limited by the information content or degrees of freedom of the measurements. Thus, use of these measurements in various inversion methods to retrieve the thermodynamic properties at more number of altitudes than the information content limit is an ill-posed as well as a non-linear problem. To overcome these shortcomings Bayesian optimal estimation method uses background information statistics.

Background information statistics here means the background information covariance information represented by the matrix  $\bar{S}_B$  and determines the range of variability information associated with water vapor or temperature profiles during a time period. Background data set is very important for the performance of the retrieval algorithm in terms of accuracy and ability to sense temporal changes. This is because background data set taken closer in time to the radiometer measurement will describe the atmospheric conditions i.e., the temperature and humidity profiles as well as the wind vector etc. during the measurements. So, the inversion of the measurements results in retrieval of the most persistent water vapor and temperature profile while being constrained by the background data set and a-priori. As a result, the retrieved profiles will detect similar features as the actual profile and hence will represent the gradients and dynamic changes in the actual profile. The

atmospheric conditions during a particular season or month are correlated because the atmospheric conditions are similar throughout the time period except a few outliers which cannot be correlated to the time of interest. Therefore, measurements along with the background data set and the a-priori will retrieve the most probable water vapor and temperature profile while an outlier might or might not be detected depending on whether that event is properly described by the background covariance matrix.

The background information covariance matrix used in this paper is shown in Figure 5 (a) and (b) and are calculated using water vapor density and temperature profiles measured over a period of one month, respectively. It can be observed that most of the water vapor variability information is between 20-40 layers which correspond to the altitude range of 2 to 4 km. On the other hand, Figure 5 (b) shows that the temperature variability information is primarily below an altitude of one km and also in the range of 2-4.2 km. In contrast to these results, when background information covariance matrix is computed from a large dataset, important weather events or temporally varying conditions are overshadowed because the covariance matrix takes into the consideration the overall variability information while reducing the weight of certain weather conditions which correspond to a particular season (Sahoo et.al., 2015b).

The goal of this study is to retrieve water vapor and temperature profiles with improved accuracy while using a background dataset measured over a period of one month so as to detect the temporal changes and gradients in the lowest 8 km of the profiles.

### 3.3 Neural Network Estimation

Estimation of water vapor and temperature profiles from microwave radiometer brightness temperatures is done using a proprietary neural network method (NN) developed by Radiometrics Corporation (Solheim, et al., 1998). NN zenith estimation of temperature, water vapor density, relative humidity, and liquid water content profiles are performed simultaneously from the radiometer measurements plus the infrared (IR) channel. The retrieved profiles are estimated at 58 height levels, with 50 meter steps from the surface up to 500 m, then 100 m steps to 2 km, and 250 m steps from 2 to 10 km. However, it has to be noted that above approximately 7 km, the atmospheric water vapor density and temperature approach the climatological mean values.

As part of the retrieval process the NN is trained using a back-propagation algorithm and radiosonde data which has been collected over a period of time i.e., usually 4 to 5 years using. The radiosonde data that is used for training the network is taken from one or more sites with the same climatological conditions as the observation site. The radiosonde profiles are used for simulating the brightness temperature using absorption models and radiative transfer equations. The NN estimation uses a standard feed-forward network (Radiometrics Corporation, 2008) to retrieve the temperature, humidity and liquid water profile that is most consistent with the atmospheric conditions and radiometric measurements.

However, in this case sufficient radiosonde profiles were not available for Mahabubnagar, so a slightly different approach was used in this study for neural network estimation of profiles. Radiosonde profiles were still used as training dataset but these were taken from areas which had similar weather conditions and same altitude and latitude (but different longitude) as



Mahabubnagar, Hyderabad. However, two sites at the same altitude and longitude may have significantly different weather depending on the general conformation of the mountains in the area, the marine currents as well as the advection processes. This could lead to biases in the training of the radiometer algorithm which in turn would increase the error of the retrieved profile.

5

#### 4. RETRIEVAL OF ATMOSPHERIC PROFILES

The Bayesian optimal estimation and NN zenith estimation method are applied to the zenith microwave measurements to estimate water vapor density and temperature profiles from ground to 8 km altitude of the troposphere for various days and times. The profile estimation method requires an initialization profile which is taken from radiosondes launched every day at 12:00 UTC. The initialization profiles from radiosondes are vertically averaged to correspond to 100 m layer thickness of retrieval. In addition to the measurements and initialization profile, background information covariance matrix is also required which is calculated from the dataset of radiosonde profiles launched during the experiment and is shown in Figure 5. The retrieved profiles are compared with those from NOAA reanalysis data. The reanalysis profiles have water vapor and temperature samples at varying pressure levels. These profiles are made uniform by interpolation so as to have samples at every 100 m interval from ground to 8 km above ground level.

##### 4.1 Water Vapor Profiles

Water vapor profiles estimated using the Bayesian optimal estimation and NN method are shown in Figure 6, along with the reanalysis data from NOAA. It can be observed that Bayesian optimal estimation performs better than the NN in estimating the water vapor profile on all the days considered. The Bayesian optimal estimation is able to detect the variation in the profiles which are smoothed by the NOAA data because of the coarse vertical resolution. Figure 6 (a) shows that both the Bayesian and NN zenith estimated water vapor profile have similar performance on 7-August-2011 when the errors are in the range of 1.5-2.5 g/m<sup>3</sup> from ground to 3 km above ground level. However, for 16-August-2011 the Bayesian and NN zenith retrieval errors are in the ranges of 0-1.5 and 0-3 g/m<sup>3</sup>, respectively, as shown in Figure 6 (b). The Bayesian retrieved profiles show significantly improved performance on 25-August-2011 and 26-August-2011 and have an error less than 1.5 g/m<sup>3</sup>, in the lowest 2 km of the troposphere which is better than the error associated with the NN zenith estimated profiles. It can also be observed from Figure 6, that at the altitude range of 3-7 km, Bayesian optimal estimation method has an error less than 0.8 g/m<sup>3</sup> except on 25-August-2011. Thus the NN zenith retrieval has a slight negative bias in the lowest 2 km of the troposphere.

In addition to the higher accuracy, Bayesian optimal estimation has been able to detect the gradient in the lowest 4 km of troposphere on 7, 16 and 25-August-2016 which is not observed in the reanalysis data. This detection of gradients in the water vapor density profiles is significant because water vapor is highly variable in the lowest 3 to 4 km of the troposphere which greatly affects the evolution of the weather changes. The statistical analysis for profiles retrieved by Bayesian optimal estimation and NN is discussed in Section 4.3.

## 4.2 Temperature Profiles

Temperature profiles were estimated using both the estimation methods (Bayesian and NN methods) and have been shown in Figure 7. The Bayesian method outperforms the NN estimated profile on all the days considered here. For altitudes below 3 km, the Bayesian optimal estimation has an error range of 0-1.5 K and for altitudes above 4 km, the Bayesian method error is less than 3 K for most the cases considered in Figure 7. The NN estimated method consistently shows a negative bias when compared with the reanalysis data at all altitudes. However, the negative bias is more significant at 3 km and above where the NN error is higher than 6 K.

It can be noted that some of the fine changes and gradients in the temperature profile in the altitude range of 0-3 km are sensed by the Bayesian estimated temperature profile. The ability to sense gradients and temporal changes in the temperature profile are because of the background covariance matrix which has been computed using a dataset compiled over one month during the measurement time. This dataset is correlated to the radiometer measurements because the radiosondes data have been taken over the time period of the measurements. Considering that the reanalysis profiles are true temperature profiles, the optimal estimation has better retrieval accuracy than that of NN zenith in the whole troposphere. The statistical analysis for Bayesian optimal estimation and NN zenith is discussed in Section 4.3.

## 4.3 Error Analysis

To analyze the performance of both the retrieval techniques, the retrieval errors are calculated as the difference between the estimated (using either the NN or the Bayesian optimal estimation) and the reanalysis profiles. The range of errors associated with the water vapor profiles estimated using NN and Bayesian optimal are shown in Figure 8 (a) and (b), respectively. Figure 8 (a) shows that the errors for NN estimation in the lowest 2 km of the troposphere are in the range of -4.5 to 4 g/m<sup>3</sup> and as the altitude increases the error range decreases and reduces to -2 to 2 g/m<sup>3</sup> at 4 km above ground level. However, the range of errors associated with the Bayesian optimal estimation are less than -1 to 1 g/m<sup>3</sup> at all altitudes for most of the cases as shown in Figure 8 (b). Thus, the error associated with the Bayesian optimal estimation is significantly less than that of the NN algorithm particularly for water vapor profile retrieval. It can also be observed that the errors in most of the cases are less than zero for both the retrieval methods. This is because of the estimated profile being less than the reanalysis profile in most of the cases (thus the negative bias). In addition to that, it can be observed that some of the retrieved profiles in Figure 8 (b) showed higher than usual errors i.e., 2 g/m<sup>2</sup> and above. This is because the water vapor profile retrieval accuracy is significantly affected by the a-priori profile as shown by Sahoo et al., 2015. If the atmospheric conditions during the a-priori profile measurement (radiosonde launch) are very different from the conditions during the radiometer measurements then the actual profile will be different from the a-priori. This will result in errors which are higher than when the a-priori and estimated profiles are similar or the weather conditions for the two times are not very different. This difference in weather conditions is due to a weather phenomenon or a rain event.

The range of errors associated with the temperature profiles are shown in Figure 9 (a) and (b) for both the NN and Bayesian optimal techniques, respectively. The error associated with the neural network profile is in the range of -3 to 5 K in the lowest 1 km of the troposphere and then the range changes to -4 to -8 K at 4 km above ground level. It is clear that the NN zenith retrieval underestimates the value of the temperature profile. The error associated with the Bayesian optimal estimated profile is shown in Figure 9 (b) and is in the range of -1 to 0 K except in the case of a few profiles. As in the case of water vapor profile, the errors associated with temperature profiles by Bayesian optimal estimation are significantly less than NN estimated profiles. The Bayesian optimally estimated retrievals using radiometer observations compare well with the reanalysis data in the lowest 2 km of troposphere because of the retrieval being constrained by a priori and surface measurements provided by the radiometer.

10 In addition to the above analysis another analysis was performed to determine the sensitivity of retrieved profile to changes in observation error covariance matrix in the Bayesian optimal estimation. Water vapor and temperature profiles have been already retrieved for various days as shown in Figure 6 and Figure 7. The profile retrieved for 7-August-2011 has been reanalyze where the profile is retrieved using the observation covariance matrix shown in Figure 3. Again the profile is retrieved after increasing the diagonal element of the observation error covariance matrix by  $0.25 \text{ K}^2$ . The retrieved profiles

15 for water vapor and temperature profile for both the observation error covariance matrices are shown in Figure 10. It can be observed that the retrieved water vapor profile for the new covariance matrix has higher error than the profile for the covariance matrix shown in Figure 3. The increase in error for the retrieved water vapor profile is in the range of 0.3 to 1.9  $\text{g/m}^3$  (0 to 8 km altitude) as the diagonal elements are increased by  $0.25 \text{ K}^2$ . Similarly, the increase of  $0.25 \text{ K}^2$  in the diagonal elements of the temperature observation covariance matrix shown in Figure 3 increases the temperature error by 0.2 to 0.5 K

20 (0 to 8 km altitude). Thus, the observation error covariance matrix has a significant impact on the retrieved profile quality and accuracy.

Another analysis was performed to determine the deviation of the retrieved profiles from the reanalysis profile, root mean squared (RMS) errors are calculated for both the methods. RMS errors are calculated by comparing radiometer retrieved humidity and temperature profiles (retrieved using both Bayesian optimal estimation and NN method) with the reanalysis

25 data (which is used as truth in this case) and are shown in Figure 11. Figure 11 (a) shows that RMS error associated with Bayesian optimal estimated water vapor profile varies from 0.2 to 0.4  $\text{g/m}^3$  for the lowest 4 km of the troposphere and is less than 0.2  $\text{g/m}^3$  above 5 km altitude. On the other hand, RMS error for NN retrieved profile is in the range of 1-2.5  $\text{g/m}^3$  in the lowest 2 km and is less than 1  $\text{g/m}^3$  above 4 km. Thus, the RMS error for water vapor profile retrieved using Bayesian optimal estimation is better than NN.

30 It can be observed from Figure 11 (b) that the RMS error for Bayesian optimal estimated temperature profiles is less than 0.6 K at any altitude from 0 to 8 km above ground level. However, the NN zenith retrieval error range is 1-2 K for lowest 2 km and then increases consistently above 2 km. The maximum error is approximately 7.5 K at 8 km above ground level. Thus, the Bayesian retrieval algorithm performs significantly better than NN zenith also for estimating temperature profile.

It has to be observed that that the RMS error for NN estimated water vapour density profile has a decreasing behaviour with altitude whereas the temperature profile RMS error increases with the height for the temperature profile. This is because NN algorithm used to retrieve the water vapor and temperature profiles has been trained using a data set which has been taken from areas which had similar weather conditions as the radiometer observation site. However, two sites at the same altitude and longitude may have significantly different weather depending on the general conformation of the mountains in the area, the marine currents as well as the advection processes. This could lead to biases in the training of the radiometer algorithm which in turn would increase the error of the retrieved profile. This is what is causing the retrieval errors for both the water vapor and temperature profiles at the lower altitudes. However, at high altitudes the range of water vapor density values which are possible are limited and close to zero as they cannot be less than zero, (obviously the climatological mean) due to which the error levels reduce at high altitudes as shown in Figure 11(a). This is not the case for temperature profiles which can have really low values at high altitudes based on training data. Therefore, the temperature profiles have a high level of bias, hence the increase in error as the altitude increases.

## 5. CONCLUSION AND DISCUSSION

This paper comprehensively describes the Bayesian optimal estimation and the improvements applied to the technique to estimate humidity and temperature profiles with increased accuracy. The Bayesian technique, is an optimal combination of ground-based observations and the related background information, hence it retains the information carried by the background dataset which provides the variability information in the lower troposphere. The background dataset is one of the important parameters in improving accuracy whose effect has been studied in great detail. The technique is applied to the radiometer measurements performed for the month of August 2011 to retrieve water vapor density and temperature profiles. The retrieved profiles show that gradients can be detected along with temporal changes. The retrieved profiles have been compared with those from the NN method and also with the NOAA reanalysis data which is considered as truth in this case. The results show that Bayesian optimal estimation using a small background information dataset (50 profiles taken over a period of one month) has better performance than the NN method (which requires a large background dataset taken over 4-5 years as training data) when a large background data set is not available to train the algorithm. This is because the profiles in the background dataset are temporally and spatially correlated with the measurements performed by the radiometer. Thus, the most persistent profile is retrieved and the Bayesian optimal estimation achieves the improved retrieval performances throughout the altitude of interest.

Water vapor profiles retrieved using the Bayesian optimal estimation technique (Figure 6) compares well with the reanalysis data for 16-August-2011 and 26-August-2011 with differences less than  $1.5 \text{ g/m}^3$  for the whole profile and for other days the difference is lower than the error observed for NN from ground to 3 km altitude. For most of the days the absolute errors are less than  $2 \text{ g/m}^3$ . In addition to that retrieved profiles are able to detect the gradients in the water vapor profile which are smoothed by the reanalysis data. On the other hand the RMS error for Bayesian estimation is less than  $0.8 \text{ g/m}^3$  from ground to 8 km altitude which is less than those observed for NN. So the water vapor profile can be retrieved with an accuracy of

better than  $1.5 \text{ g/m}^3$ . Temperature profiles estimated using Bayesian optimal estimation have been observed in Figure 7 to have differences of less than 3 K when compared with the reanalysis data while the NN profiles usually have a difference of 3 K or more for the whole profile. However, on most of the days temperature profiles can be retrieved at an accuracy of better than 1.5 K while detecting the gradients. This has been again proved in the RMS error analysis in Figure 11. The  
5 RMS error shows that Bayesian method has error less than 0.7 K while the NN has error higher than 2 K and increases as the altitude increases.

Along with other analyses, one has been performed to determine the sensitivity of retrieved profile accuracy to change in observation error covariance matrix. It has been observed that water retrieved profile error increases by almost  $1\text{-}2 \text{ g/m}^3$  with an increase of  $0.25 \text{ K}^2$  of the diagonal elements of the matrix. However, an increase of  $0.25 \text{ K}^2$  of the diagonal elements of the temperature error covariance matrix results in an increase of error less than 0.8 K.  
10

## ACKNOWLEDGEMENT

Authors would like to thank Earth System Research Laboratory, National Oceanic and Atmospheric Administration (NOAA), for providing such an useful reanalysis dataset which helped in analyzing the error associated with the estimated  
15 profiles. We would also like to thank Dr. Xavier Bosch-Lluis for his important contribution and suggestions.

## References

- Ali, M. M.: Cyclone, in: Remote Sensing Applications, P. S. Roy, R. S. Dwivedi, and D. Vijayan.: National Remote Sensing Centre, Hyderabad, India, 11, 273-282, 2009.
- Rao, T. N., Sunilkumar, K., and Jayaraman, A.: Validation of humidity profiles obtained from SAPHIR, on-board Megha-Tropiques, Special Section: Megha-Tropiques, Current Sci. 104(12), 1635-1642, June 2013.  
20
- Cimini, D., Hewison, T. J., Martin, L., Güldner, J., and Marzano, F. S.: Temperature and humidity profile retrievals from ground based microwave radiometers during TUC, Meteor. Z., 15, 45-56, Feb. 2006.
- Feltz, W. F., Howell, H. B., Knuteson, R. O., Woolf, H. M., and Revercomb, H. E.: Near continuous profiling of temperature, moisture, and atmospheric stability using the Atmospheric Emitted Radiance Interferometer (AERI), J. Appl. Meteorol., 42, 584-597, 2003.  
25
- Goldsmith, J. E. M., Blair, F. H., Bisson, S. E., and Turner, D. D.: Turn-key Raman lidar for profiling atmospheric water vapor, clouds, and aerosols, Appl. Opt., 37, 4979-4990, Jul. 1998.
- Hewison, T. J.: 1D-VAR retrieval of temperature and humidity profiles from a ground-based microwave radiometer, IEEE Trans. Geosci. Remote Sens., 45, 2163-2168, Jul. 2007.
- 30 Iturbide-Sanchez, F., Reising, S. C., & Padmanabhan, S.: A miniaturized spectrometer radiometer based on MMIC technology for tropospheric water vapor profiling. IEEE Trans. Geosci. Remote Sens., 44(7), 2181-2193, Jul. 2007.
- Leena, P. P., Dani, K. K., Nath, A. Sanap, S. D., Pandithurai, G., Kumar, V. A.: Validation of ground-based microwave radiometer data and its application in verifying atmospheric stability over Mahbubnagar during 2011 monsoon and post-  
35 monsoon seasons. Int. J. Remote Sens., 36 (11), 2920-2933, March 2015.

- Liebe, H.J., G.A.Hufford and M.G.Cotton, 1993: "Propagation modeling of moist air and suspended water/ice particles at frequencies below 1000GHz", AGARD 52nd Specialists' Meeting of the Electromagnetic Wave Propagation Panel, Ch3.
- 5 Liljegren, J.C.: [https://www.arm.gov/publications/tech\\_reports/handbooks/mwrrp\\_handbook.pdf](https://www.arm.gov/publications/tech_reports/handbooks/mwrrp_handbook.pdf), [Online], Microwave Radiometer Profiler Handbook, 2002.
- Marzano, F. S., Cimini, D., Memmo, A., Montopoli, M., Rossi, T., De Sanctis, M., et al.: Flower Constellation of Millimeter-Wave radiometers for Tropospheric monitoring at pseudogeostationary scale. *IEEE Trans. Geosci. Remote Sens.*,  
10 47(9), 3107-3122, Sept. 2009.
- Needs, N. R.: *Observing Weather and Climate from the Ground Up: A Nationwide Network of Networks*. National Academies, Washington, DC, 2009.
- National Research Council Committee on Developing Mesoscale Meteorological Observational Capabilities to Meet Multiple National Needs, *Observing Weather and Climate from the Ground Up: A Nationwide Network of Networks*,  
15 National Academies, Washington, DC, 2009.
- Radiometrics corporation.: *Profiler Operator's Manual*, Boulder, CO, 2008.
- Rodgers, C. D.: *Inverse Methods for Atmospheric Sounding: Theory and Practice*, World Scientific, 2000.
- Rosenkranz, P. W.: *Absorption of Microwaves by Atmospheric Gases*, Atmospheric remote sensing by microwave radiometry, Wiley-Interscience Publication, 37-90, 1993.
- 20 Rosenkranz, P. W.: Water Vapor Microwave Continuum Absorption: A Comparison Of Measurements And Models, *Radio Sci.*, 33, 919-928, 1998.
- Rosenkranz, P. W.: Retrieval of temperature and moisture profiles from AMSU-A and AMSU-B measurements. *IEEE Trans. Geosci. Remote Sensing*, 39(11), 2429-2435, Nov. 2001.
- Sahoo, S., Bosch-Lluis, X., Reising, S. C., and Vivekanandan, J.: Radiometric Information Content for Water Vapor and Temperature Profiling in Clear Skies between 10 and 200 GHz, *IEEE J. Sel. Topics Appl. Earth Observ. Remote Sens.*, 8,  
25 859-871, Feb. 2015a.
- Sahoo, S., Bosch-Lluis, X., Reising, S. C., and Vivekanandan, J.: Optimization of Background Information and Layer Thickness for Improved Accuracy of Water-Vapor Profile Retrieval from Ground-Based Microwave Radiometer Measurements at K-band, *IEEE J. Sel. Topics Appl. Earth Observ. Remote Sens.*, 8, 4284 - 4295, Sept. 2015b.
- 30 Scheve, T. M. and Swift, C. T.: Profiling atmospheric water vapor with a K-band spectral radiometer, *IEEE Trans. Geosci. Remote Sens.*, 37, 1719-1729, May 1999.
- Solheim, F. S., Godwin, J. R., Westwater, E. R., Han, Y., Keihm, S. J., Marsh, K. and Ware, R.: Radiometric profiling of temperature, water vapor, and cloud liquid water using various inversion methods, *Radio Sci.*, 33, 393 - 404, 1998.
- Spuler, S. M., Repasky, K. S., Morley, B., Moen, D., Hayman, M., and Nehrir, A. R.: Field-deployable diode-laser based differential absorption lidar (DIAL) for profiling water vapor, *Atmos. Meas. Tech.*, 8, 1073-1087, doi:10.5194/amt-8-1073-2015, 2015.
- 35 Susskind, J., Blaisdell, J. M., Iredell, L., & Keita, F.: Improved temperature sounding and quality control methodology using AIRS/AMSU data: The AIRS Science Team Version 5 Retrieval Algorithm. *IEEE Trans. Geosci. Remote Sensing*, 49(3), 883-907, Mar. 2011.

Trenberth, K. E., Fasullo, J., Smith, L.: Trends and variability in column-integrated atmospheric water vapor, *Clim. Dyn.*, 24, 741-758, 2005.

Wang, J. and Zhang, L.: Systematic errors in global radiosonde perceptible water data from comparisons with ground-based GPS measurements, *J. Clim.*, 21, 2218-2238, 2008.

- Westwater, E. R.: Ground-based microwave remote sensing of meteorological variables, *Atmospheric Remote Sensing by Microwave Radiometry*, 145-214, 1993.

## FIGURES

10

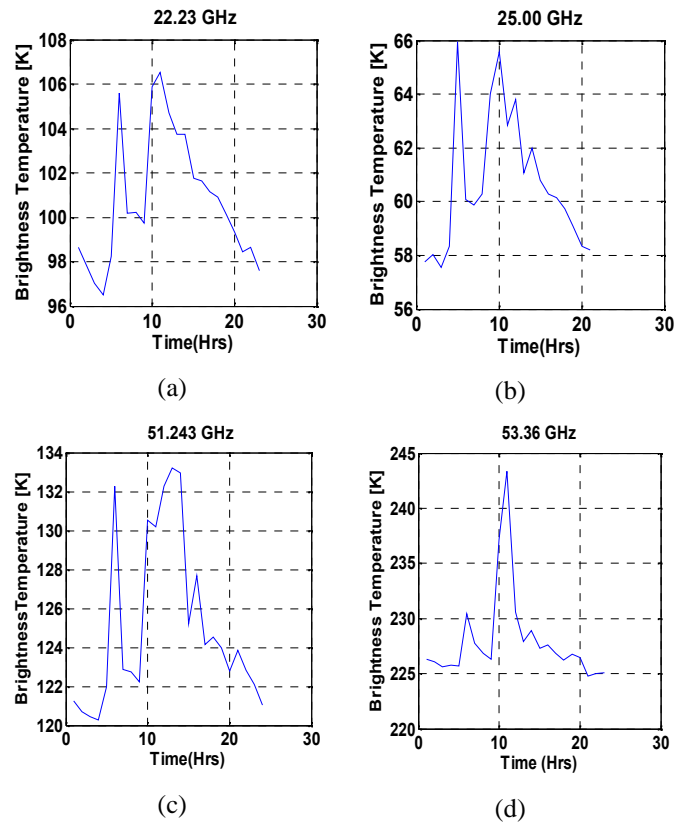

Figure 1. Time series of brightness temperature at 22.23, 25.0, 51.243 and 53.36 GHz.

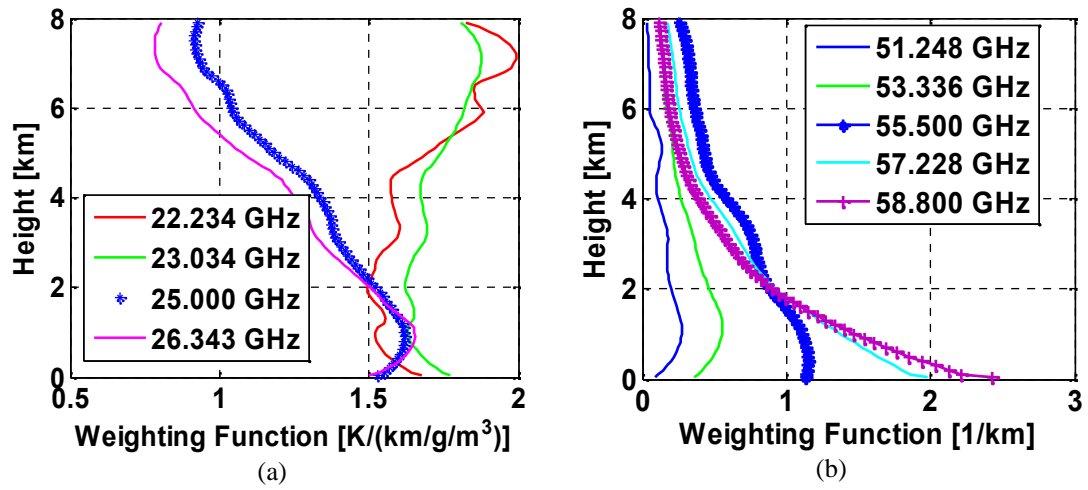

Figure 2. (a) Weighting functions for measurement frequencies used for water vapor profile retrieval. (b) Weighting functions for measurement frequencies used for temperature profile retrieval.

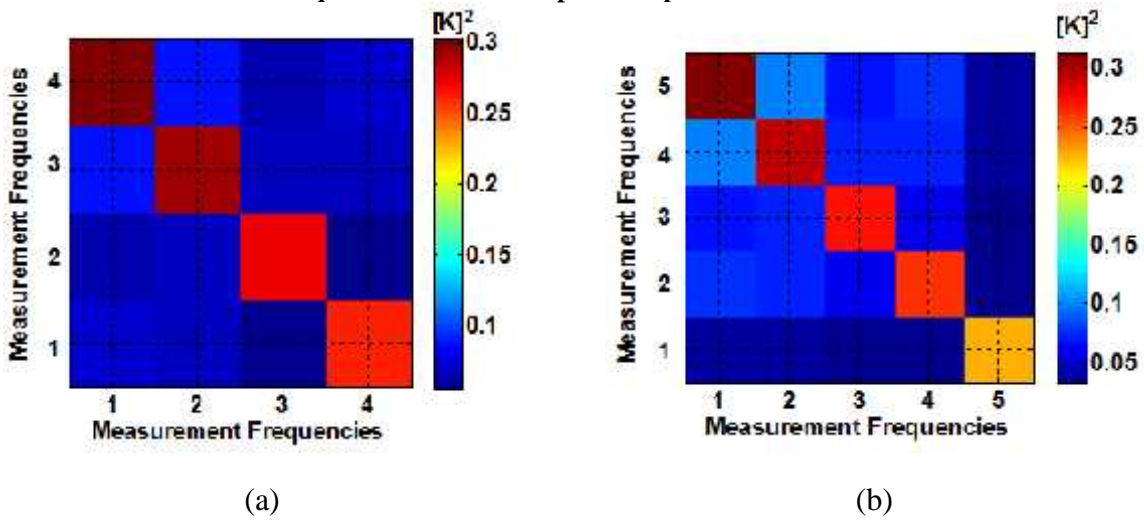

Figure 3. The observation error covariance matrix for (a) water vapour frequency measurements (b) temperature measurements.



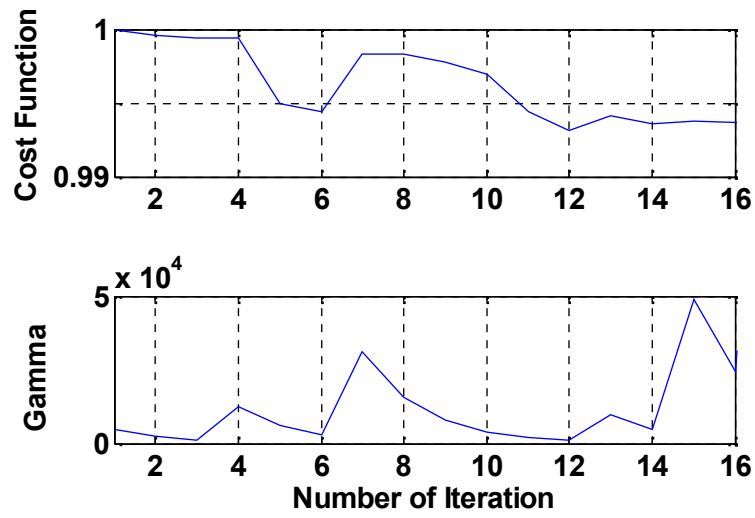

Figure 4. The value of cost function and gamma with respect to number of iterations are shown in the top and bottom figure respectively.

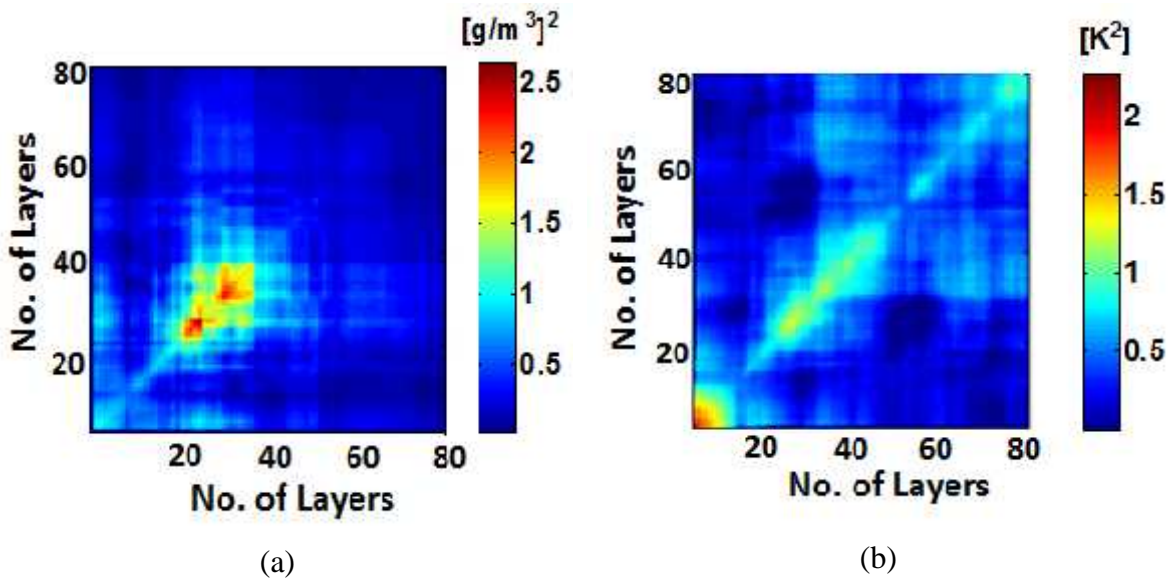

5 Figure 5. Background information covariance matrix for 80 layers (100 m thick) (a) water density (b) temperature profiles. The x and y axes are in kilometers for both the figures.

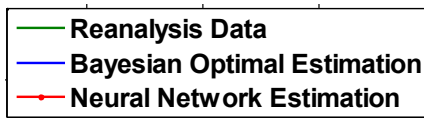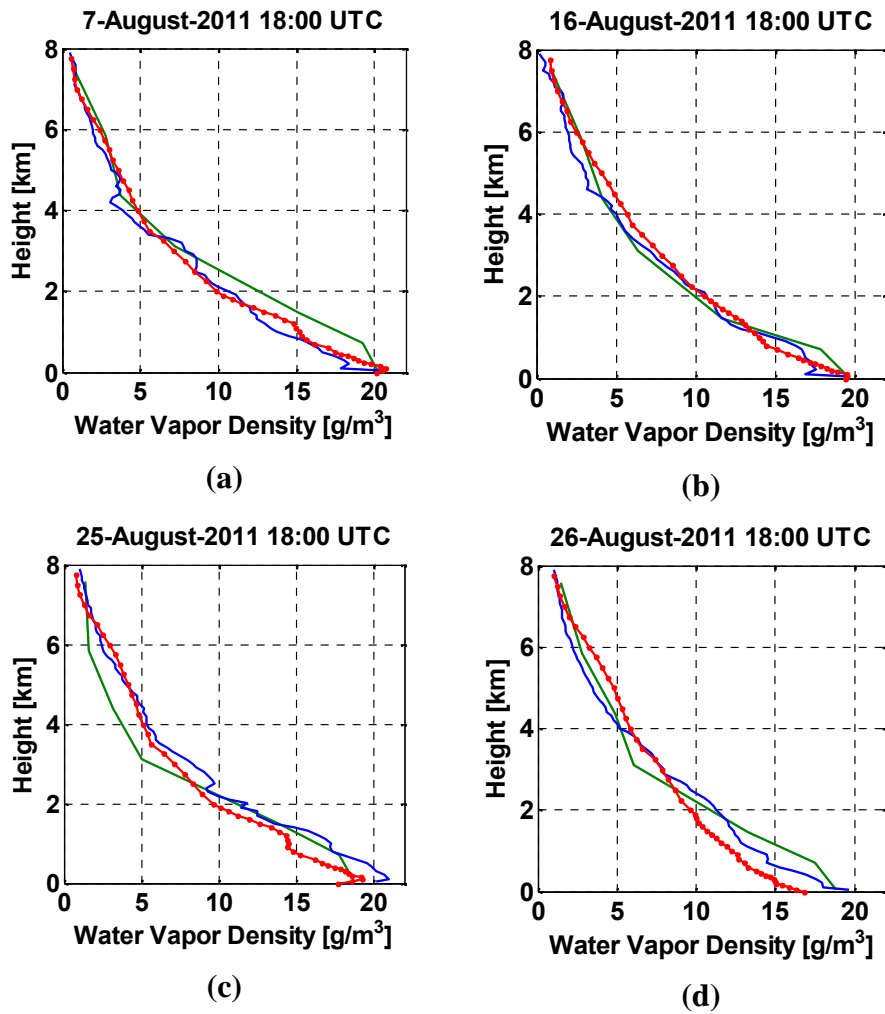

Figure 6. Time series analysis data of water vapor retrieved profiles.

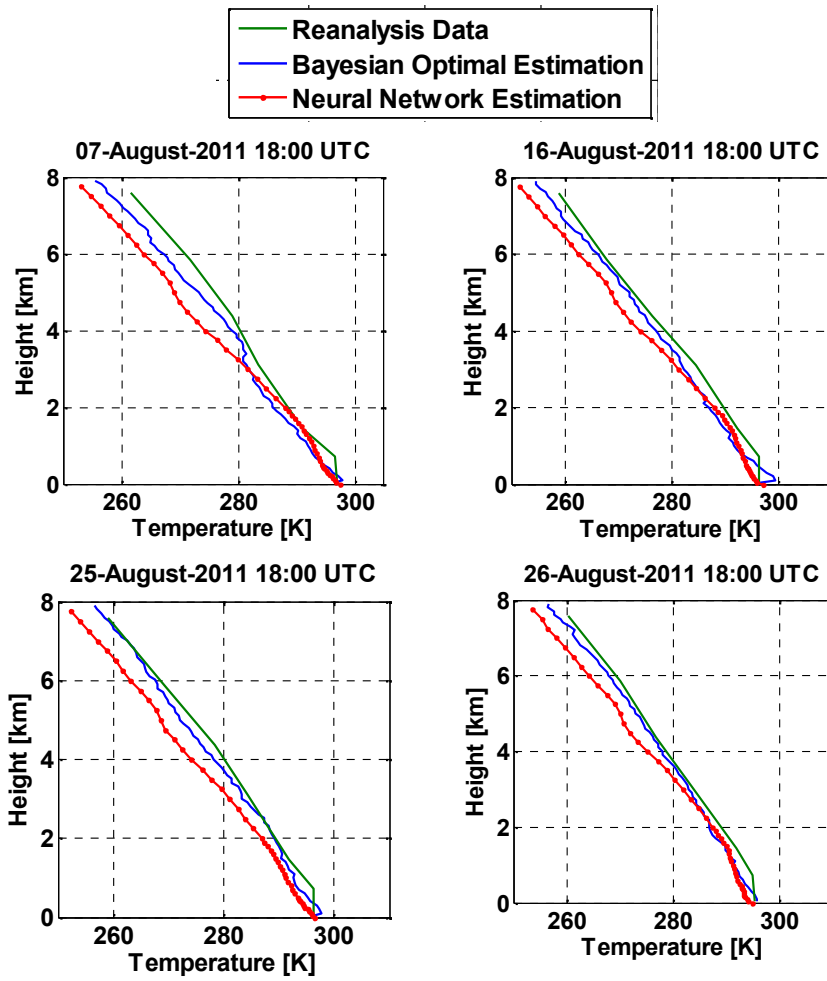

Figure 7. Time series analysis data of temperature retrieved profiles.

5

10

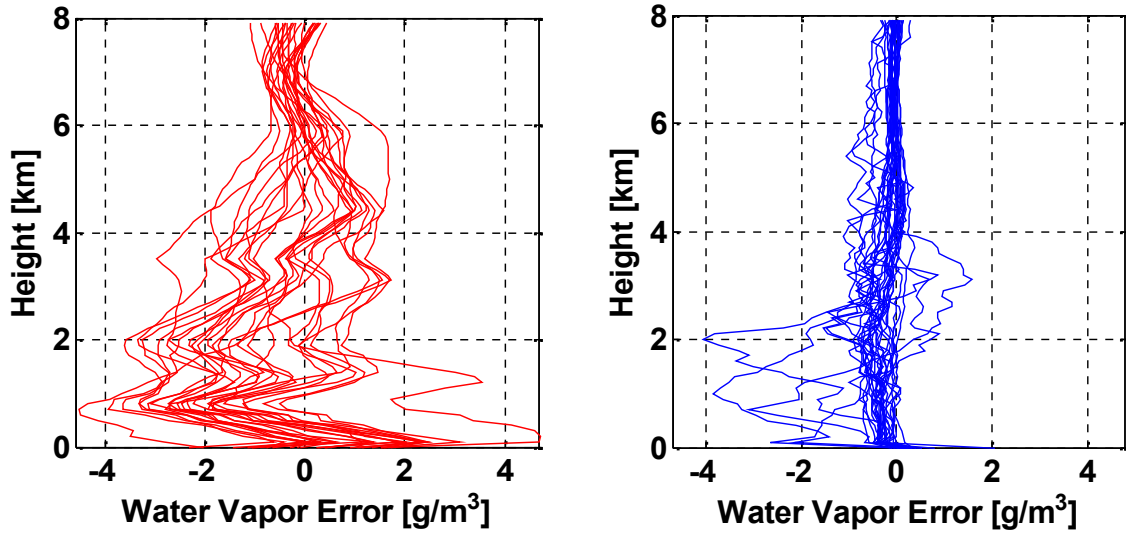

5 Figure 8. Error associated with water vapor density profile retrieved by (a) neural network (b) Bayesian optimal estimation.

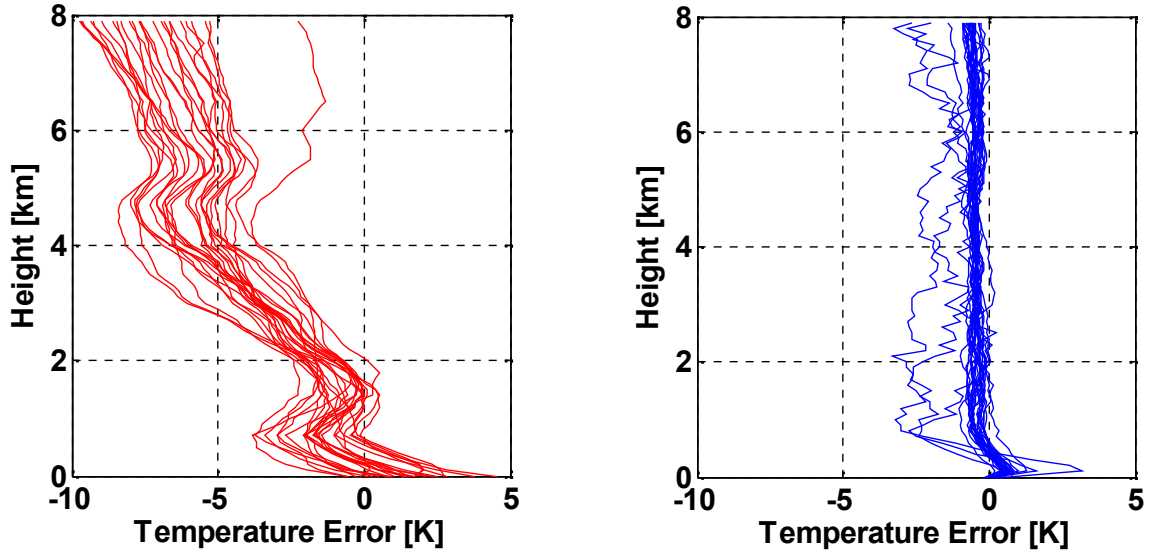

Figure 9. Error associated with temperature profiles retrieved by (a) neural network (b) Bayesian optimal estimation.

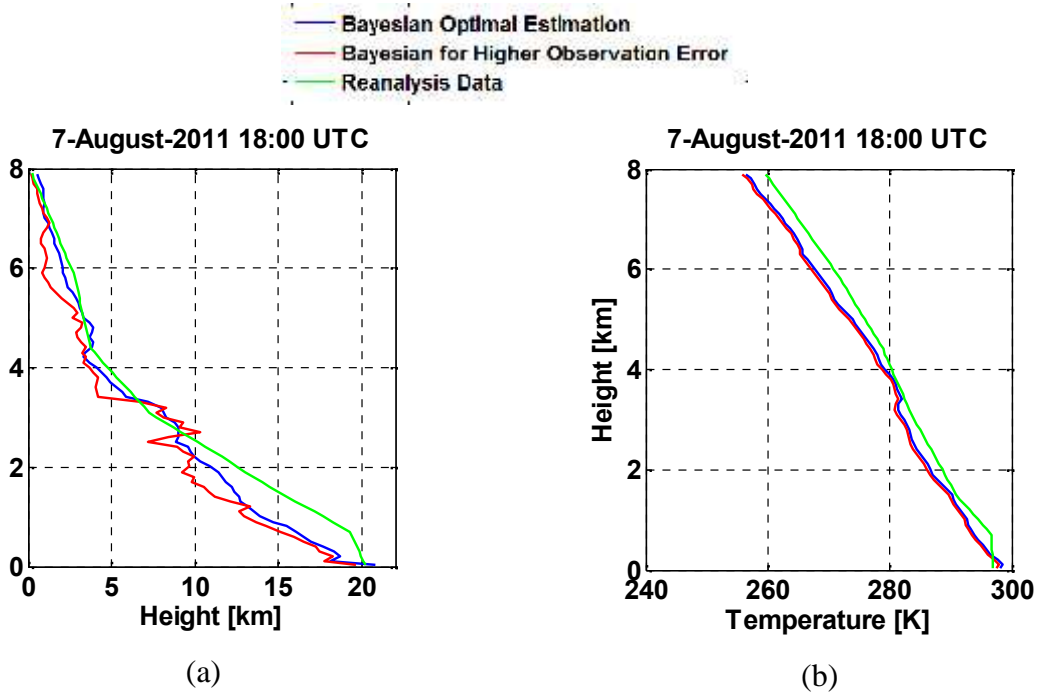

Figure 10. Retrieved profile sensitivity to observation error covariance matrix (a) Water vapor profile (b) Temperature profile

5

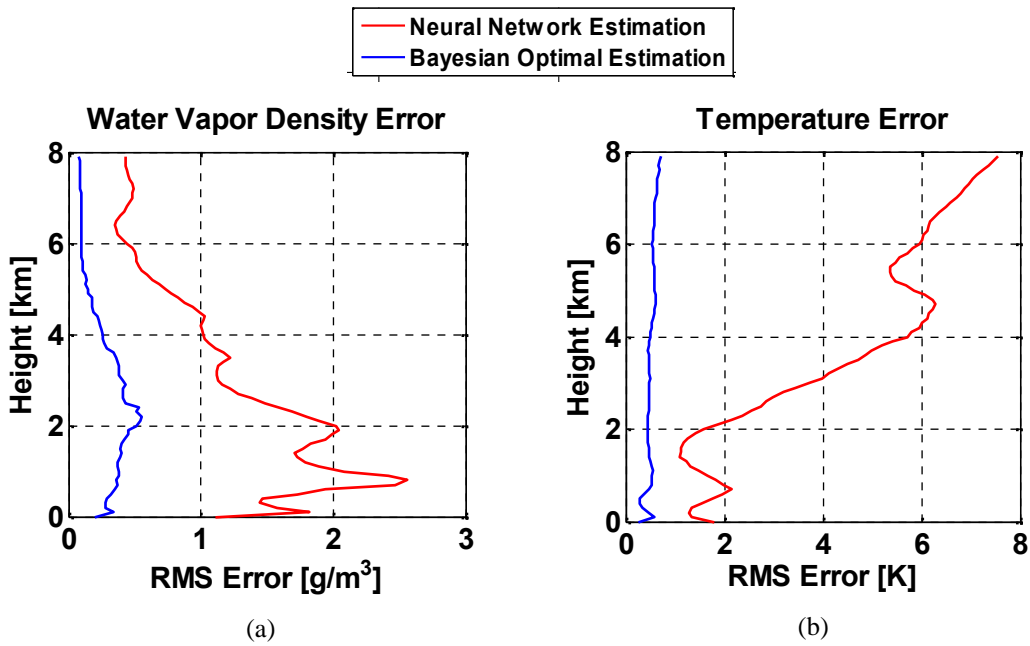

Figure 11: RMS Error analysis for (a) water vapor profiles and (b) temperature profiles.
